# Supplementary material for: Hyperbranched polymers for controlled release of cisplatin
Source: Royal Society of Chemistry journal article supplement (doi:10.1039/b809949a), 2008-01-01
Supplement: b809949a.pdf [file b809949a.pdf]

Electronic Supplementary Information for Dalton Transactions  
This journal is © The Royal Society of Chemistry 2008

Hyperbranched Polymers for Controlled Release of Cisplatin

Katherine J. Haxton<sup>a,b</sup>, and Helen M. Burt\*<sup>a</sup>

a – Faculty of Pharmaceutical Sciences, University of British Columbia, 2146 East  
Mall, Vancouver V6T 1Z3, British Columbia, Canada. Email:

burt@interchange.ubc.ca; Fax: +1 604 8223035

b – School of Physical and Geographical Sciences, Keele University, Keele,  
Staffordshire, ST5 5BG, UK

**Supplementary Information**

**Materials:**

Polymers: Boltorn H40 was obtained from Perstorp, PG2 from Hyperpolymers. Succinic anhydride, *cis*-diamminedichloroplatinum(II), anhydrous pyridine, 4-(dimethylamino)pyridine and 1,2-phenylenediamine were obtained from Sigma-Aldrich Canada. N,N-dimethylformamide – Fisher, Spectranalysed grade, Spectra/Por 7 pretreated dialysis membranes, molecular weight cut off (MWCO) 1000, and 1cm<sup>3</sup>/cm width, from Spectrum Labs.

NMR spectra were run on a Bruker Avance 400dir Spectrometer. UV-Vis

**Methods:**

*Modification of H40*

Boltorn H40 (10 g, 0.002 moles, 0.128 moles OH based on molecular weight of 5.1 kDa and 64 terminal OH groups) was added to pyridine (50 cm<sup>3</sup>) and stirred rapidly to facilitate dissolution. Dimethylaminopyridine (0.2 g, 0.0016 moles) was added followed by the slow addition of succinic anhydride (14 g, 0.14 moles). An additional volume of pyridine (20 cm<sup>3</sup>) was added to ensure the resulting solution was not too viscous for efficient stirring. The reaction was stirred overnight at room temperature (approx 22°C). Water was added (50 cm<sup>3</sup>) and the mixture stirred for 30 minutes. Solvents were removed by rotary evaporation with the periodic addition of small portions of water to enable better evaporation of pyridine by azeotropic distillation. The residue was dissolved in methanol and dialyzed against distilled water for 16 hours. The dialysis buffer was changed four times, each time with a greater methanol concentration. The final buffer was 70 % methanol in distilled water. The solvent was removed by rotary evaporation and the polymer dried in a vacuum oven over night.

$\delta_{\text{H}}$  (400 MHz, MeOD-d<sub>4</sub>, MeOH): 1.15-1.4 (br m, initiator core, CH<sub>3</sub> on polymer ); 2.6 (br,s, CH<sub>2</sub>CH<sub>2</sub>COOH); 3.3 (br, m, CH<sub>3</sub>OH, solvent); 3.7 (br, m, CH<sub>2</sub>OH); 4.2-4.4 (br m, CH<sub>2</sub>OR); 4.9 (br, s, OH)

$\delta_C$  (100 MHz, MeOD-d<sub>4</sub>, MeOH): 17.9, 18.4 (CH<sub>3</sub> on polymer); 29-30.2(C(O)CH<sub>2</sub>CH<sub>2</sub>COOH); 47.9-50.0 (quarternary carbons in polymer backbone); 65.6-67.2 (CH<sub>2</sub>O); 173.5-174.8 (C(O)CH<sub>2</sub>); 176.0 (COOH)

### *Modification of PG2*

Pyridine (50 cm<sup>3</sup>) was added to PG2 (10 g, 0.005 moles, 0.100 moles OH based on molecular weight of 2 kDa, and 20 terminal OH groups) and stirred rapidly to facilitate dissolution. Dimethylaminopyridine (0.2 g, 0.0016 moles) was added followed by the slow addition of succinic anhydride (12 g, 0.12 moles). The reaction was stirred overnight at room temperature (approx 22°C). Water was added (50 cm<sup>3</sup>) and the mixture stirred for 30 minutes. Solvents were removed by rotary evaporation with the periodic addition of small portions of water to enable better evaporation of pyridine by azeotropic distillation. The residue was dissolved in methanol and dialyzed against distilled water for 16 hours. The dialysis buffer was changed four times, each time with a greater methanol concentration. The final buffer was 70 % methanol in distilled water. The solvent was removed by rotary evaporation and the polymer dried in a vacuum oven over night.

$\delta_H$  (400 MHz, MeOD-d<sub>4</sub>, MeOH): 0.84 (3H, br s, CH<sub>3</sub>, Polymer Initiator, ); 2.55 – 2.70 (br s, OCOCH<sub>2</sub>CH<sub>2</sub>COOH), 3.26 (br s, 1H); 3.30 – 3.32 (13H, m, CH<sub>3</sub>OH), 3.35 (20H, br s, CH<sub>3</sub>CH<sub>2</sub>C(CH<sub>2</sub>O)<sub>3</sub>); 3.45 – 3.81 (br m, CH, CH<sub>2</sub>, polymer backbone); 4.08 – 4.40 (br m, CH<sub>2</sub>OCO); 5.04 (s, CH<sub>2</sub>OCO); 5.04 – 5.24 (br m, CHOCO )  
 $\delta_C$  (100 MHz, MeOD-d<sub>4</sub>, MeOH): 30.0 (C(O)CH<sub>2</sub>CH<sub>2</sub>COOH); 64.0-65.0 (CH<sub>2</sub>OH, unreacted primary alcohol groups in polymer); 67.0 (CH<sub>2</sub> in polymer); 70.0-74.0(CH<sub>2</sub>O and CHO groups in polymer); 78.5, 80.5 (CH in polymer); 174.0 (C(O)CH<sub>2</sub>CH<sub>2</sub>COOH); 176.0 (C(O)CH<sub>2</sub>CH<sub>2</sub>COOH)

*Formation of platinum-hyperbranched polymer complexes*

*H40 Solution*

A solution of modified H40 polymer in water was prepared by dissolving polymer in dilute sodium hydroxide solution (0.05M NaOH) to give a 10 mg/cm<sup>3</sup> polymer solution.

*PG2 Solution*

A solution of modified PG2 polymer in water was prepared by dissolving polymer in dilute sodium hydroxide solution (0.05M NaOH) to give a 20 mg/cm<sup>3</sup> polymer solution.

*Cisplatin Solution*

Cisplatin solution was prepared to 1.25 mg/cm<sup>3</sup> in distilled water or saline.

*Complex Formation*

Cisplatin and polymer were mixed according to table with each sample prepared in triplicate, having a total volume of 5 cm<sup>3</sup> with 5 mg total mass of cisplatin and 0.01 M in sodium hydroxide. The samples were incubated at 37°C for 72 hours under static conditions if required.

| <b>Cisplatin</b> | <b>Polymer</b> | <b>Reaction Buffer</b>             | <b>Incubation</b> | <b>Release Buffer</b> |
|------------------|----------------|------------------------------------|-------------------|-----------------------|
| 5 mg             | None           | Water                              | N/A               | Water                 |
|                  |                | Saline                             | N/A               | Saline                |
| 5 mg             | H40<br>10 mg   | 0.01M sodium<br>hydroxide solution | 0                 | Water                 |
|                  |                |                                    |                   | Saline                |
| 5 mg             | H40<br>10 mg   | 0.01M sodium<br>hydroxide solution | 72 hours          | Water                 |
|                  |                |                                    |                   | Saline                |
| 5 mg             | PG2<br>20 mg   | 0.01M sodium<br>hydroxide solution | 0                 | Water                 |
|                  |                |                                    |                   | Saline                |
| 5 mg             | PG2<br>20 mg   | 0.01M sodium<br>hydroxide solution | 72 hours          | Water                 |
|                  |                |                                    |                   | Saline                |

### *Platinum Complex Release Studies*

Release studies of cisplatin and related compounds were conducted by dialysis. 12 cm lengths of dialysis membrane were soaked in water to remove preservative and clamped using weighted dialysis clamps. Polymer-drug solution was pipetted into the bags and a clip applied to seal the bags. In some cases sodium chloride was added to the polymer-drug solutions prior to filling dialysis bags, ensuring the concentration was approximately 0.9 % w/w saline. The dialysis bags were trimmed to allow approx 0.5 cm<sup>3</sup> of membrane either end. Release was carried out in saline (500 cm<sup>3</sup>, 0.9 %) in a media bottle (500 cm<sup>3</sup>), at 37°C and 75 rpm agitation. Samples of release buffer (0.5 cm<sup>3</sup>) were taken at each time point (0.5, 1, 2, 4, 8, 24, 48, 72, 96, 120, 144, 168 hours).

### *Cisplatin Assay*

Cisplatin concentrations were determined by the o-phenylenediamine (OPDA) colorimetric assay developed by Golla *et al.*<sup>15,16</sup>. A solution of ortho-phenylenediamine (OPDA) in N,N-dimethylformamide (1.6 mg/cm<sup>3</sup>) was prepared. Samples from dialysis experiments were mixed with an equal volume of OPDA solution, and the resulting mixture boiled in a water bath for 30 minutes, ensuring no water entered the sample tube. Samples were analysed by UV-Visible spectroscopy, reading at 704 nm. Standard curves were generated using standard samples of cisplatin in each release medium (fig. S3), as both media and sodium hydroxide concentration were found to have an effect on the assay. The linear range for this assay was found to be 0.5 – 16 µg/cm<sup>3</sup>.

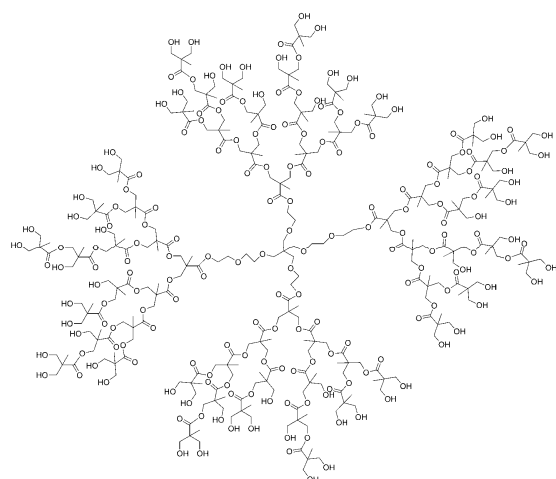

**Fig. S1** Hyperbranched polyester, boltorn H40 modified with carboxylic acid groups

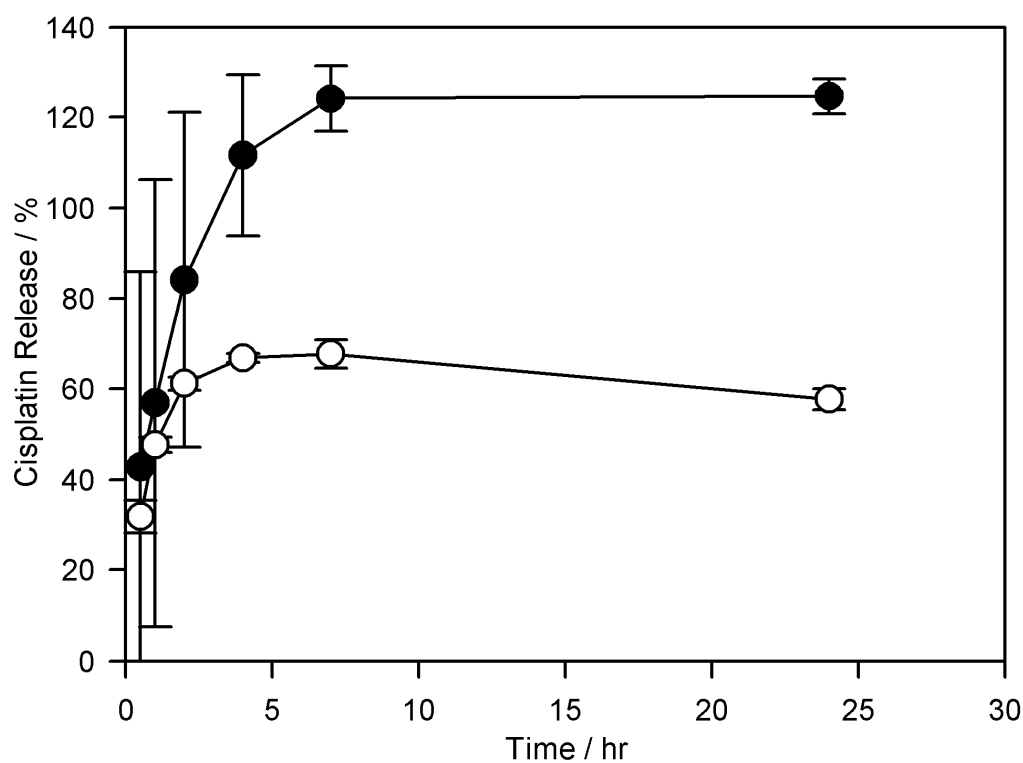

**Fig. S2** Cumulative release of platinum complexes from H40 with no incubation time prior to dialysis. (n=3, ● – saline, ○ – water)

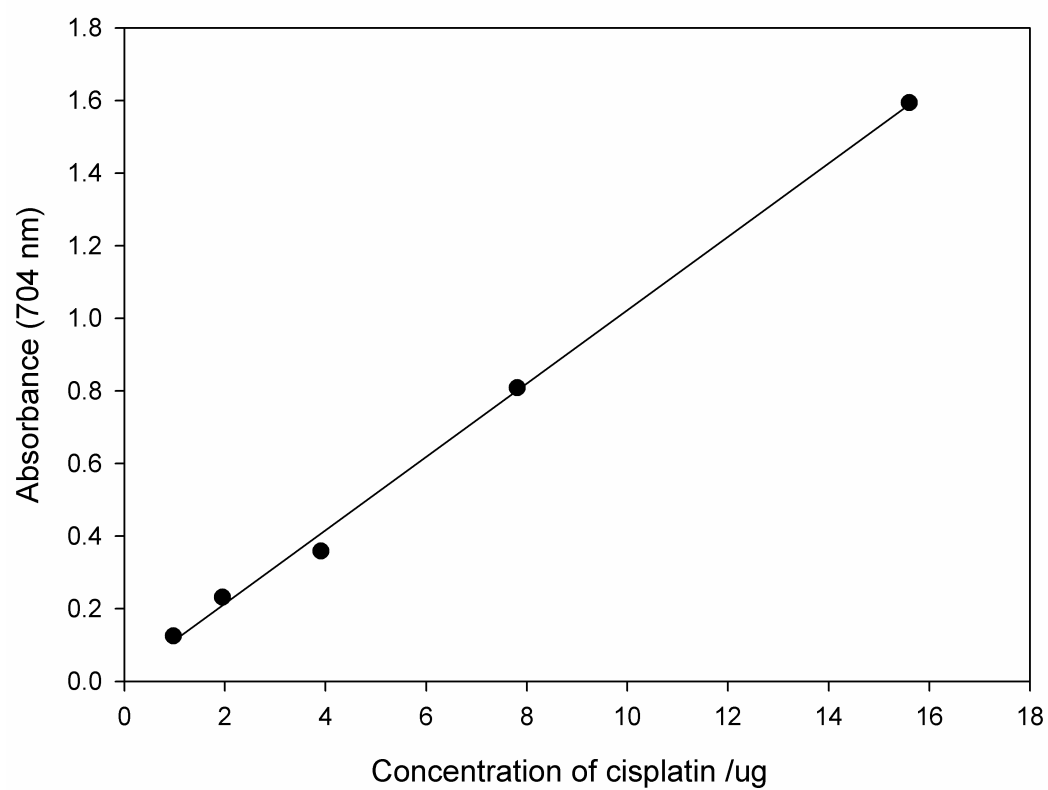

**Fig. S3** OPDA Assay standard Curve,  $R^2 = 0.9979$
